# Supplementary material for: Supplementation with the Prebiotic High-Esterified Pectin Improves Blood Pressure and Cardiovascular Risk Biomarker Profile, Counteracting Metabolic Malprogramming
Source: PubMed Central journal article supplement (PMC9585587; doi:10.1021/acs.jafc.2c03143), 2022-10-10

## Supplementary material

**Supplementary Table 1.** List of primers used for *q*PCR determinations.

| <b>Gene</b>     | <b>Gene name</b>                                | <b>Forward (5' to 3')</b>   | <b>Reverse (5' to 3')</b> | <b>Amplicon size (pb)</b> |
|-----------------|-------------------------------------------------|-----------------------------|---------------------------|---------------------------|
| <i>Cpt1b</i>    | Carnitine palmitoyltransferase 1b               | GCTCGCACATTACAAGGACAT       | TGGACACCACATAGAGGCAG      | 250                       |
| <i>Fasn</i>     | Fatty acid synthase                             | CGGCGAGTCTATGCCACTAT        | ACACAGGGACCGAGTAATGC      | 222                       |
| <i>Fgfr1</i>    | Fibroblast growth factor receptor 1             | TCCGCAGACAGGTAACAGTG        | AGCTAGCATGGGGGTTCC        | 107                       |
| <i>Gdi1</i>     | GDP dissociation inhibitor 1                    | CCGACAAGGCAAATACATC         | GACTCTCTGAACCGTCATCAA     | 159                       |
| <i>Klb</i>      | Klotho beta                                     | CCCTCGAACACCGTGGTAAA        | AACCAGCCGTTCTCCGAAAT      | 119                       |
| <i>Mstn</i>     | Myostatin                                       | AGCTGCGCCTGGAAACAGCTC       | TTCCCGGAGTGGAGGCGCTC      | 80                        |
| <i>Myocd</i>    | Myocardin                                       | CCGTGAAAGAGGCTATAAAAGG      | TTCCCGGAGTGGAGGCGCTC      | 76                        |
| <i>Nppa</i>     | Natriuretic peptide A                           | CACAGATCTGATGGATTTCAAG<br>A | CCTCATCTTCTACCGGCATC      | 68                        |
| <i>Nppb</i>     | Natriuretic peptide B                           | GTCAGTCGCTTGGGCTGT          | CCAGAGCTGGGGAAAGAAG       | 105                       |
| <i>Nppc</i>     | Natriuretic peptide C                           | AGCGGTCTGGGATGTTAGTG        | CCAAGGATGACCTCAGTGC       | 75                        |
| <i>Pmsa6</i>    | Proteasome subunit alpha 6                      | TGGCTATGAGATTCCTGTGG        | CTGTCTGCTTCACTCCTGCT      | 206                       |
| <i>Ppara</i>    | Peroxisome proliferator activate response alpha | TGTCGAATATGTGGGGACAA        | AAACGGATTGCATTGTGTGA      | 215                       |
| <i>Ppargc1a</i> | PPAR gamma, coactivator 1 alpha                 | AGGAGGGTCATCGTTTGTGG        | GGAGGCAGAAGAGCCGTC        | 256                       |
| <i>Prkaa2</i>   | Protein kinase, 5'- AMP-activated, alpha 2      | CCAAGTGATCAGCACTCCAA        | CAACACGTTCTCTGGCTTCA      | 199                       |

**Supplementary Table 2.** List of primary antibodies used for Western Blot analysis.

| <b>Protein</b> | <b>Antibody for protein complete name</b>                                        | <b>Company</b>            | <b>Reference</b> |
|----------------|----------------------------------------------------------------------------------|---------------------------|------------------|
| ACTB           | Anti- Beta-Actin                                                                 | Cell Signaling Technology | 3700             |
| ATGL           | Anti- Adipose Triglyceride Lipase                                                | Cayman chemical           | 10006409         |
| COXIV          | Anti- Cytochrome c oxidase subunit 4                                             | Cell Signaling Technology | 4844             |
| CPT1           | Anti- Carnitine Palmitoyl Transferase 1                                          | Santa Cruz Biotechnology  | sc-98834         |
| pAKT           | Anti- v-AKT murine Thymoma Viral Oncogene homolog 1 phosphorylated at serine 473 | Cell Signaling Technology | 4051             |
| pAMPK          | Anti- AMP-Activated Protein kinase phosphorylated at threonine 172               | Cell Signaling Technology | 2535             |

## List of Abbreviations

---

|       |                                                      |          |                                                     |
|-------|------------------------------------------------------|----------|-----------------------------------------------------|
| ACTB  | $\beta$ -actin                                       | Klb      | $\beta$ -Klotho                                     |
| AKT   | Protein kinase B                                     | mRNA     | Messenger RNA                                       |
| AMPK  | 5'-AMP-activated protein kinase                      | Mstn     | Myostatin                                           |
| ANOVA | Analysis of variance                                 | Myocd    | Myocardin                                           |
| ATGL  | Adipose triglyceride lipase                          | Nppa     | Natriuretic peptide A                               |
| BP    | Blood pressure                                       | Nppb     | Natriuretic peptide B                               |
| COX4  | Cytochrome c oxidase subunit 4                       | Nppc     | Natriuretic peptide C                               |
| Cpt1b | Carnitine palmitoyltransferase 1b                    | PBMC     | Peripheral Blood Mononuclear Cell                   |
| CR    | Calorie restriction (group)                          | PCA      | Principal Components Analysis                       |
| C     | Control (group)                                      | PCR      | Polymerase chain reaction                           |
| CRP   | Calorie restriction supplemented with pectin (group) | Pmsa6    | Proteasome subunit alpha type-6                     |
| DBP   | Diastolic blood pressure                             | Ppara    | Peroxisome proliferator-activated receptor $\alpha$ |
| DMS   | Minimum Significant Differences                      | Ppargc1a | PPAR $\gamma$ -coactivator 1 $\alpha$               |
| DNA   | Deoxyribonucleic acid                                | Prkaa2   | AMPK catalytic subunit alpha-2                      |
| Fasn  | Fatty acid synthase                                  | RNA      | Ribonucleic acid                                    |
| FGF21 | Fibroblast growth factor 21                          | SBP      | Systolic blood pressure                             |
| Fgfr1 | FGF21 receptor                                       | SCFA     | Short-chain fatty acids                             |
| Gdi1  | GDP dissociation inhibitor alpha                     | SD       | Standard diet                                       |
| HEP   | High esterified pectin                               | SEM      | Standard error of mean                              |
| HS    | High-sucrose diet                                    | TG       | Triglycerides                                       |

---

# Supplementary Figure 1

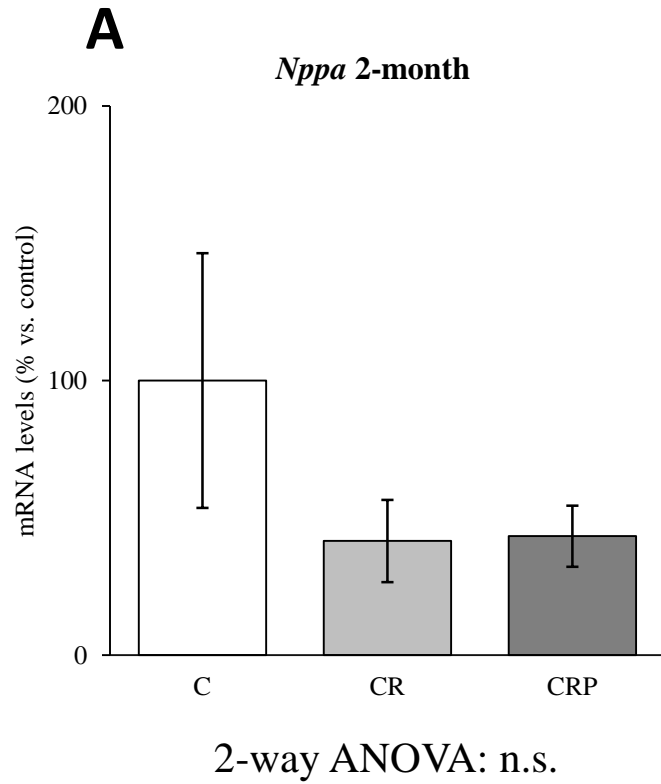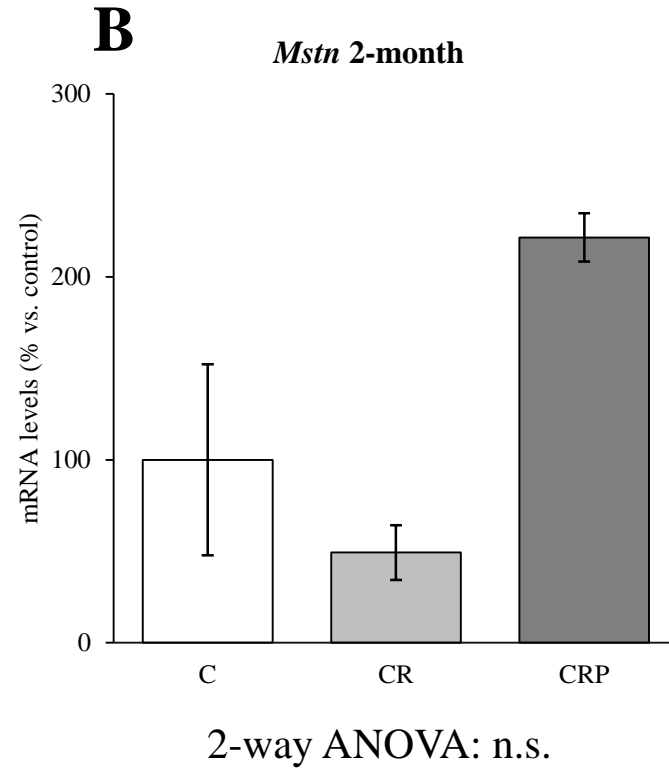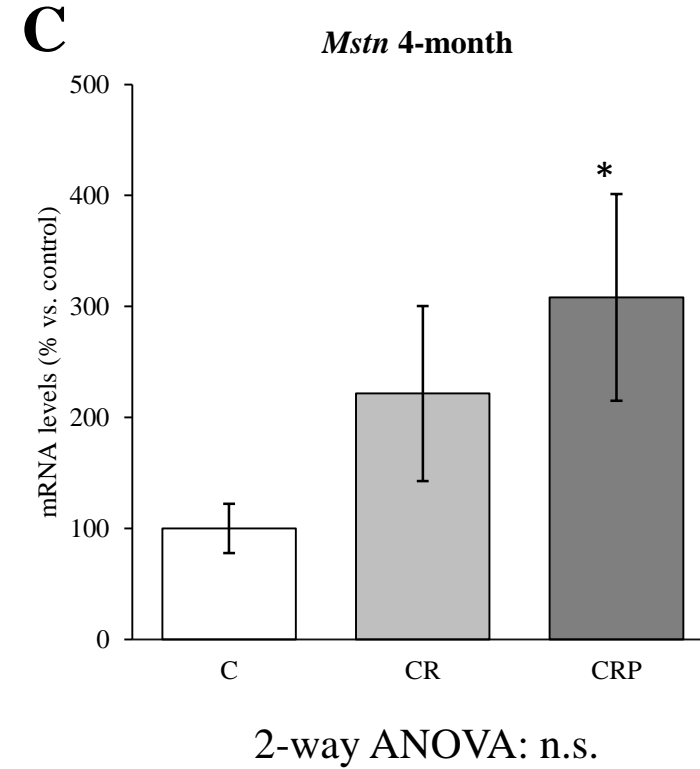

Supplement: jf2c03143_si_001.pdf [file jf2c03143_si_001.pdf]
